# Supplementary material
Source: PubMed Central journal article supplement (PMC9388590)
Supplement: NIHMS1810665-supplement-Supplemental_Data_File__doc__pdf__etc__.pdf [file NIHMS1810665-supplement-Supplemental_Data_File__doc__pdf__etc__.pdf]

# Incidence and Risk Factors for New Onset Diabetes Mellitus Following Surgical Resection of Pancreatic Cystic Lesions *A MarketScan Study*

| <b>SUPPLEMENTAL TABLE 1.</b> Variables and Corresponding ICD and CPT Coding |                                                                                                                                                                                                                                                                                                                                         |                                                                                                                                  |                                                                                                       |
|-----------------------------------------------------------------------------|-----------------------------------------------------------------------------------------------------------------------------------------------------------------------------------------------------------------------------------------------------------------------------------------------------------------------------------------|----------------------------------------------------------------------------------------------------------------------------------|-------------------------------------------------------------------------------------------------------|
|                                                                             | <b>ICD-9-CM/PCS Code</b>                                                                                                                                                                                                                                                                                                                | <b>ICD-10-CM/PCS Code</b>                                                                                                        | <b>CPT Code</b>                                                                                       |
| <b>Inclusion</b>                                                            |                                                                                                                                                                                                                                                                                                                                         |                                                                                                                                  |                                                                                                       |
| Pancreatic cystic lesion                                                    | 577.2                                                                                                                                                                                                                                                                                                                                   | K86.2, K86.3                                                                                                                     |                                                                                                       |
| Pancreatectomy, distal                                                      | 52.52                                                                                                                                                                                                                                                                                                                                   | 0FBG*, 0FTG*                                                                                                                     | 48140, 48145, 48146                                                                                   |
| Pancreatectomy, proximal<br>(Whipple-type procedure)                        | 52.51, 52.7                                                                                                                                                                                                                                                                                                                             | 0FBG* or 0FTG*<br>+ 0DT9* or 0DB9*                                                                                               | 48150, 48152, 48153,<br>48154                                                                         |
| Pancreatectomy, unknown<br>proximal or distal                               | 52.5, 52.53, 52.59                                                                                                                                                                                                                                                                                                                      |                                                                                                                                  |                                                                                                       |
| Excision of lesion of pancreas                                              |                                                                                                                                                                                                                                                                                                                                         |                                                                                                                                  | 48120                                                                                                 |
| <b>Exclusion</b>                                                            |                                                                                                                                                                                                                                                                                                                                         |                                                                                                                                  |                                                                                                       |
| Any prior DM or use of DM<br>medications                                    | 249*, 250*                                                                                                                                                                                                                                                                                                                              | E08*, E09*, E10*,<br>E11*, E13*                                                                                                  |                                                                                                       |
| Pregnancy                                                                   | 63*, 64*, 65*, 66*,<br>670*, 671*, 672*, 673*,<br>674*, 675*, 676*, 677*,<br>V22*, V23*, V24*,<br>V27*, V28.0*, V28.1*,<br>V28.2*, V28.6*, V61.5,<br>V61.6, V61.7, 792.3,<br>796.5, V65.11, V72.42,<br>72.*, 73.*, 74.*, 75.0*,<br>75.1*, 75.2*, 75.4*,<br>75.5*, 75.3, 75.30,<br>75.31, 75.32, 75.33,<br>75.34, 75.35, 75.36,<br>75.37 | O0*, O1*, O2*, O3*,<br>O4*, O6*, O7*, O8*,<br>O9* Z76.81, Z64.0,<br>Z64.1, Z32.01, Z33*,<br>Z34*, Z36*, Z37*,<br>Z39*, Z3A*, 10* |                                                                                                       |
| Total pancreatectomy                                                        | V88.11                                                                                                                                                                                                                                                                                                                                  | Z90.410                                                                                                                          | 48155                                                                                                 |
| Prior partial pancreatectomy                                                | V88.12                                                                                                                                                                                                                                                                                                                                  | Z90.411                                                                                                                          |                                                                                                       |
| Prior other pancreatic surgery†                                             |                                                                                                                                                                                                                                                                                                                                         |                                                                                                                                  | 48000, 48001, 48020,<br>48510, 48545, 48547,<br>48548, 48550, 48551,<br>48552, 48554, 48556,<br>48999 |
| Islet cell transplantation                                                  |                                                                                                                                                                                                                                                                                                                                         |                                                                                                                                  | 48160                                                                                                 |
| Necrosectomy following acute<br>pancreatitis                                |                                                                                                                                                                                                                                                                                                                                         |                                                                                                                                  | 48105                                                                                                 |
| Acute pancreatitis                                                          | 577.0                                                                                                                                                                                                                                                                                                                                   | K85*                                                                                                                             |                                                                                                       |
| Chronic pancreatitis                                                        | 577.1                                                                                                                                                                                                                                                                                                                                   | K86.0, K86.1                                                                                                                     |                                                                                                       |
| Cystic Fibrosis                                                             | 277.0*                                                                                                                                                                                                                                                                                                                                  | E84*                                                                                                                             |                                                                                                       |
| Hemochromatosis                                                             | 275.01, 275.02, 275.03                                                                                                                                                                                                                                                                                                                  | E83.11*                                                                                                                          |                                                                                                       |
| Pancreatic cancer                                                           | 157*                                                                                                                                                                                                                                                                                                                                    | C25*                                                                                                                             |                                                                                                       |
| <b>Outcome</b>                                                              |                                                                                                                                                                                                                                                                                                                                         |                                                                                                                                  |                                                                                                       |
| Diabetes mellitus                                                           | 249*, 250*                                                                                                                                                                                                                                                                                                                              | E08*, E09*, E10*,<br>E11*, E13*                                                                                                  |                                                                                                       |
| Post-surgical hypoinsulinemia                                               | 251.3                                                                                                                                                                                                                                                                                                                                   | E89.1                                                                                                                            |                                                                                                       |
| <b>Other variables</b>                                                      |                                                                                                                                                                                                                                                                                                                                         |                                                                                                                                  |                                                                                                       |
| Open surgery                                                                | 54.21 not present                                                                                                                                                                                                                                                                                                                       | 0FBG0*, 0FTG0*                                                                                                                   | 48999 not present                                                                                     |
| Laparoscopic or robotic surgery                                             | 54.21 present                                                                                                                                                                                                                                                                                                                           | 0FBG4*, 0FTG4*                                                                                                                   | 48999 present                                                                                         |
| Splenectomy during pancreas<br>resection                                    | 41.43, 41.5                                                                                                                                                                                                                                                                                                                             | 07TP*, 07BP*                                                                                                                     | 38100, 38101, 38102,<br>38120                                                                         |

*(Continued on next page)*

**SUPPLEMENTAL TABLE 1. (Continued)**

|                                      | ICD-9-CM/PCS Code                                                                             | ICD-10-CM/PCS Code                                                                         | CPT Code |
|--------------------------------------|-----------------------------------------------------------------------------------------------|--------------------------------------------------------------------------------------------|----------|
| Comorbidities                        |                                                                                               |                                                                                            |          |
| Essential hypertension               | 401*                                                                                          | I10*                                                                                       |          |
| Hyperlipidemia                       | 272.0, 272.1, 272.2,<br>272.3, 272.4, 272.8,<br>272.9                                         | E78.0, E78.1, E78.2,<br>E78.3, E78.4*, E78.5,<br>E78.8*, E78.9                             |          |
| Obesity                              | 278.00, 278.01, 278.02,<br>V85.3*, V85.4*                                                     | E66.0*, E66.1, E66.2,<br>E66.8, E66.9, Z68.3*,<br>Z68.4*                                   |          |
| Tobacco use                          | 305.1, V15.82                                                                                 | F17.20*, F17.21*,<br>F19.9*, Z87.891                                                       |          |
| Alcohol abuse/dependence             | 303*, 305.0*                                                                                  | F10*                                                                                       |          |
| Pancreatic anomalies                 | 751.7                                                                                         | Q45.0, Q45.1, Q45.3                                                                        |          |
| Cardiovascular disease/heart failure | 410*, 411*, 412*,<br>413*, 414*, 428*,<br>440*, 441*, 443.2*,<br>443.81, 443.9, 444*,<br>445* | I21*, I22*, I23*, I24*,<br>I25*, I50*, I70*, I71*,<br>I73.89, I73.9, I77.7*,<br>I74*, I75* |          |
| Cerebrovascular disease              | 430*, 431*, 432*,<br>433*, 434*, 435*,<br>436*, 437*, 438*                                    | I60*, I61*, I62*, I63*,<br>I65*, I66*, I67*, I68*,<br>I69*                                 |          |
| Chronic kidney disease               | 403*, 404*, 582*,<br>583*, 585*, 586*,<br>588*, V42.0, V45.1*,<br>V56*                        | I12*, I13*, N03*, N05*,<br>N18*, N19*, N25*,<br>Z94.0, Z99.2, Z49*                         |          |
| Alcoholic liver disease              | 571.0, 571.1, 571.2,<br>571.3                                                                 | K70*                                                                                       |          |
| Chronic hepatitis B                  | 070.22, 070.23, 070.32,<br>070.33                                                             | B18.0, B18.1                                                                               |          |
| Chronic hepatitis C                  | 070.44, 070.54, 070.7*                                                                        | B18.2                                                                                      |          |
| COPD                                 | 490*, 491*, 492*,<br>493*, 494*, 495*, 496*                                                   | J40*, J41*, J42*, J43*,<br>J44*, J45*, J47*                                                |          |
| Depression                           | 296.2*, 296.3*, 300.4,<br>311                                                                 | F32*, F33*, F34.1                                                                          |          |
| Charlson comorbidity index           | —                                                                                             | —                                                                                          |          |

\*Denotes inclusion of all subsequent codes with the preceding numerals.

†Not including codes related to pancreatic cysts; biopsy of pancreas (48100, 48102), injection procedure of pancreas (48400), internal anastomosis of pancreatic cyst to gastrointestinal tract (48520, 48540), marsupialization of pancreatic cyst (48500).

ICD-9-CM indicates *International Classification of Diseases*, ninth edition clinical modification; PCS, procedural coding system; CPT, current procedural terminology; DM, diabetes mellitus; COPD, chronic obstructive pulmonary disease.

**SUPPLEMENTAL TABLE 2.** Stepwise Exclusions Applied to Achieve Final Study Cohort

| <b>MarketScan 2012–2018</b>                          | <b>No. Subjects</b> |
|------------------------------------------------------|---------------------|
| Partial pancreatectomy                               | 14,396              |
| PCLs                                                 | 2006                |
| Exclusions                                           |                     |
| No enrollment information                            | 73                  |
| <18 years old                                        | 165                 |
| <3 months prior enrollment                           | 1481                |
| <1 month post-surgery enrollment                     | 576                 |
| Total pancreatectomy                                 | 821                 |
| Pregnancy                                            | 146                 |
| Islet auto-transplantation                           | 9                   |
| Cystic fibrosis                                      | 18                  |
| Hemochromatosis                                      | 45                  |
| Necrosectomy                                         | 275                 |
| No data/encounters prior to surgery                  | 30                  |
| DM or DM meds within 12 months prior                 | 3675                |
| Prior pancreatic enzymes                             | 188                 |
| AP within 6 months prior                             | 1809                |
| Prior CP                                             | 522                 |
| Prior other pancreas surgery                         | 485                 |
| Prior pancreatectomy                                 | 1                   |
| Total exclusions                                     | 10,319              |
| Remaining                                            | 4077                |
| PCLs                                                 | 390                 |
| Non-PCLs                                             | 3687                |
| Further exclusions for cysts                         |                     |
| Prior pancreatic cancer (not including surgery date) | 79                  |
| Final inclusion                                      | 311                 |

PCL indicates pancreatic cystic lesion; AP, acute pancreatitis; CP, chronic pancreatitis.

**SUPPLEMENTAL TABLE 3.** Diabetic Medications Searched for in the MarketScan Database to Denote the Presence of Diabetes Mellitus

| Medication Class         | Single (Generic)                                                                                                                                                         | Combination (Generic)     | Brand Name                                                         |                     |
|--------------------------|--------------------------------------------------------------------------------------------------------------------------------------------------------------------------|---------------------------|--------------------------------------------------------------------|---------------------|
| α-glucosidase inhibitors | Acarbose                                                                                                                                                                 |                           | Precose                                                            |                     |
|                          | Miglitol                                                                                                                                                                 |                           | Glyset                                                             |                     |
| Biguanides               | Metformin                                                                                                                                                                |                           | Glucophage, Metformin Hydrochloride ER, Glumetza, Riomet, Fortamet |                     |
|                          |                                                                                                                                                                          | metformin-alogliptin      | Kazano                                                             |                     |
|                          |                                                                                                                                                                          | metformin-canagliflozin   | Invokamet                                                          |                     |
|                          |                                                                                                                                                                          | metformin-dapagliflozin   | Xigduo XR                                                          |                     |
|                          |                                                                                                                                                                          | metformin-empagliflozin   | Synjardy                                                           |                     |
|                          |                                                                                                                                                                          | metformin-glipizide       |                                                                    |                     |
|                          |                                                                                                                                                                          | metformin-glyburide       | Glucovance                                                         |                     |
|                          |                                                                                                                                                                          | metformin-linagliptin     | Jentaduetto                                                        |                     |
|                          |                                                                                                                                                                          | metformin-pioglitazone    | Actoplus                                                           |                     |
|                          |                                                                                                                                                                          | metformin-repaglinide     | PrandiMet                                                          |                     |
|                          |                                                                                                                                                                          | metformin-rosiglitazone   | Avandamet                                                          |                     |
|                          |                                                                                                                                                                          | metformin-saxagliptin     | Kombiglyze XR                                                      |                     |
|                          |                                                                                                                                                                          | metformin-sitagliptin     | Janumet                                                            |                     |
|                          |                                                                                                                                                                          | DPP-4 inhibitors          | Alogliptin                                                         |                     |
| Alogliptin-metformin     | Kazano                                                                                                                                                                   |                           |                                                                    |                     |
| linagliptin              | Alogliptin-pioglitazone                                                                                                                                                  |                           | Oseni                                                              |                     |
|                          | linagliptin-empagliflozin                                                                                                                                                |                           | Tradjenta                                                          |                     |
| saxagliptin              | linagliptin-metformin                                                                                                                                                    |                           | Glyxambi                                                           |                     |
|                          | saxagliptin-metformin                                                                                                                                                    |                           | Jentaduetto                                                        |                     |
| sitagliptin              |                                                                                                                                                                          |                           | Onglyza                                                            |                     |
|                          | sitagliptin-metformin                                                                                                                                                    |                           | Kombiglyze XR                                                      |                     |
| GLP-1 receptor agonists  | albiglutide<br>dulaglutide<br>exenatide<br>exenatide extended-release<br>liraglutide<br>semaglutide<br>lixisenatide<br><i>Meglitinides</i><br>nateglinide<br>repaglinide |                           |                                                                    | Januvia             |
|                          |                                                                                                                                                                          |                           | Sitagliptin-simvastatin                                            | Janumet, Janumet XR |
|                          |                                                                                                                                                                          |                           | Juvisync                                                           |                     |
|                          |                                                                                                                                                                          |                           | Tanzeum                                                            |                     |
|                          |                                                                                                                                                                          |                           | Trulicity                                                          |                     |
|                          |                                                                                                                                                                          |                           | Byetta                                                             |                     |
|                          |                                                                                                                                                                          |                           | Bydureon                                                           |                     |
|                          |                                                                                                                                                                          |                           | Victoza                                                            |                     |
|                          |                                                                                                                                                                          |                           | Ozempic                                                            |                     |
|                          |                                                                                                                                                                          |                           | Adlyxin                                                            |                     |
| SGLT-2 inhibitors        | dapagliflozin                                                                                                                                                            | repaglinide-metformin     | Prandimet                                                          |                     |
|                          |                                                                                                                                                                          | dapagliflozin-metformin   | Farxiga                                                            |                     |
|                          | canagliflozin                                                                                                                                                            |                           | Xigduo XR                                                          |                     |
|                          |                                                                                                                                                                          | canagliflozin-metformin   | Invokana                                                           |                     |
|                          | empagliflozin                                                                                                                                                            |                           | Invokamet                                                          |                     |
|                          |                                                                                                                                                                          | empagliflozin-linagliptin | Jardiance                                                          |                     |
| ertugliflozin            | empagliflozin-metformin                                                                                                                                                  | Glyxambi                  |                                                                    |                     |
|                          |                                                                                                                                                                          | Synjardy                  |                                                                    |                     |
| Sulfonylureas            | glimepiride                                                                                                                                                              |                           | Steglatro                                                          |                     |
|                          |                                                                                                                                                                          | glimepiride-pioglitazone  | Amaryl                                                             |                     |
|                          | gliclazide<br>glipizide                                                                                                                                                  | glimepiride-rosiglitazone | Duetact                                                            |                     |
|                          |                                                                                                                                                                          |                           | Avandaryl                                                          |                     |
|                          |                                                                                                                                                                          | Glucotrol, Glucotrol XL   |                                                                    |                     |

(Continued on next page)

**SUPPLEMENTAL TABLE 3.** *(Continued)*

| Medication Class   | Single (Generic)                            | Combination (Generic)                                                                                       | Brand Name                                          |                                           |
|--------------------|---------------------------------------------|-------------------------------------------------------------------------------------------------------------|-----------------------------------------------------|-------------------------------------------|
| Thiazolidinediones | glyburide                                   | glipizide-metformin                                                                                         | Metaglip<br>DiaBeta, Glynase, Micronase,<br>Glycron |                                           |
|                    |                                             | glyburide-metformin                                                                                         | Glucovance                                          |                                           |
|                    | chlorpropamide<br>tolazamide<br>tolbutamide |                                                                                                             |                                                     | Diabinese<br>Tolinase<br>Orinase, Tol-Tab |
|                    |                                             |                                                                                                             | rosiglitazone                                       | Avandia                                   |
|                    |                                             |                                                                                                             | rosiglitazone-glimepiride                           | Avandaryl                                 |
|                    | pioglitazone                                |                                                                                                             | rosiglitazone-metformin                             | Amaryl M<br>Actos                         |
|                    |                                             |                                                                                                             | pioglitazone-alogliptin                             | Oseni                                     |
|                    |                                             |                                                                                                             | pioglitazone-glimepiride                            | Duetact                                   |
|                    |                                             |                                                                                                             | pioglitazone-metformin                              | Actoplus Met, Actoplus Met<br>XR          |
|                    |                                             |                                                                                                             |                                                     |                                           |
| Insulin            | Aspart<br>Glulisine<br>Lispro<br>Regular    |                                                                                                             | Novolog, Fiasp<br>Apidra<br>Humalog, Admelog        |                                           |
|                    |                                             |                                                                                                             | Humulin R, Novolin R,<br>Velosulin R                |                                           |
|                    |                                             |                                                                                                             | Humulin N, Novolin N, ReliOn                        |                                           |
|                    | NPH<br>Detemir<br>Glargine<br>Degludec      |                                                                                                             | Levemir<br>Basaglar, Lantus, Toujeo<br>Tresiba      |                                           |
|                    |                                             |                                                                                                             | Novolog mix 70/30                                   |                                           |
|                    |                                             |                                                                                                             | Humalog mix 75/25 and 50/50                         |                                           |
|                    |                                             | Aspart protamine and<br>aspart mixture<br>Lispro protamine and<br>lispro mixture<br>NPH and regular mixture | Humulin mix 70/30, Novolin<br>mix 70/30             |                                           |
|                    |                                             | Humulin R U-500                                                                                             |                                                     |                                           |

DPP-4 indicates dipeptidyl peptidase-4; GLP-1, glucagon-like peptide-1; SGLT-2, sodium-glucose cotransporter-2.

**SUPPLEMENTAL TABLE 4.** Kaplan-Meier Estimates for Time to NODM at Select Time Points for Subjects Undergoing Distal Compared to Proximal Pancreatectomy for PCLs: Analysis of the IBM MarketScan Research Database®, 2012-2018

| <b>Time Post-Surgery, mo</b> | <b>Distal (95% CI), %</b> | <b>Proximal (95% CI), %</b> |
|------------------------------|---------------------------|-----------------------------|
| 3                            | 7.0 (4.3–11.3)            | 7.4 (3.2–16.9)              |
| 6                            | 9.6 (6.3–14.5)            | 9.2 (4.2–19.4)              |
| 12                           | 17.5 (12.6–24.0)          | 11.3 (5.5–22.5)             |
| 18                           | 20.3 (14.8–27.5)          | 11.3 (5.5–22.5)             |
| 24                           | 24.4 (18.1–32.5)          | 11.3 (5.5–22.5)             |
| 36                           | 27.7 (20.5–36.9)          | 11.3 (5.5–22.5)             |
| 48                           | 35.7 (25.7–48.2)          | 26.1 (8.5–64.1)             |

NODM indicates new-onset diabetes mellitus; PCL, pancreatic cystic lesion; CI, confidence interval.
